# 1 **Rapid behavioural response of urban birds to covid-19** 2 **lockdown**

3 Oscar Gordo<sup>1\*</sup>, Lluís Brotons<sup>2,3,4</sup>, Sergi Herrando<sup>1</sup>, Gabriel Gargallo<sup>1</sup>

4 <sup>1</sup> Catalan Ornithological Institute, ES-08019, Barcelona, Spain

5 <sup>2</sup> InForest Joint Research Unit (CTFC-CREAF), ES-25280, Solsona, Spain

6 <sup>3</sup> Centre of Ecological Research and Forestry Applications, ES-08193, Bellaterra, Spain

7 <sup>4</sup> Consejo Superior de Investigaciones Científicas, ES-08193, Cerdanyola del Vallès,  
8 Spain.

9 \* Author for correspondence

10 e-mail: [ogvilloslada@gmail.com](mailto:ogvilloslada@gmail.com)

11 **ORCID:** OG, 0000-0003-3766-0566; LB, 0000-0002-4826-4457; SH, 0000-0002-5153-7970; GG,  
12 0000-0003-3527-1997

13

14

## 15 **Abstract**

16 Biodiversity is threatened by the current exponential growth of urban areas. However, it is still  
17 poorly understood how animals can cope with and adapt to these rapid and dramatic  
18 transformations of natural environments. The COVID-19 pandemic provides us with a unique  
19 opportunity to unveil the adaptive mechanisms involved in this process. Lockdown measures  
20 imposed in most countries are causing an unprecedented reduction of human activities giving us  
21 an experimental setting to assess the effects of our lifestyle on biodiversity. We studied the birds'  
22 response to the Spanish population lockdown by using more than 126,000 bird records collected  
23 by a citizen science project. We compared the occurrence and detectability of birds during the  
24 spring 2020 lockdown with baseline data from previous years in the same urban areas and dates.  
25 We found that birds did not increase their probability of occurrence in urban areas during the  
26 lockdown, refuting the hypothesis that nature has recovered its space in human emptied urban  
27 areas. However, we found an increase in bird detectability, especially during early morning,  
28 suggesting a rapid change in the birds' daily routines in response to quieter and less crowded cities.  
29 In conclusion, urban birds show high behavioural plasticity to rapidly adapt to novel environmental  
30 conditions, as those imposed by the COVID-19.

31

32 **Keywords:** Coronavirus disease, behavioural plasticity, urban ecology, detectability, citizen  
33 science

34

35 **Running Title:** COVID-19 and birds

36

## 37 **1. Introduction**

38 Since the first human settlements some millennia ago, the anthropogenic transformation of the  
39 natural environment to build towns and cities has been a hallmark of humanity. During the last  
40 century, urbanization has experienced exponential growth across the world and it is expected to  
41 continue as more people will move from rural to urban areas [1-4]. As a result, urbanization has  
42 become one of the most important drivers of global change and a major threat to biodiversity  
43 [2,4,6,7]. Novel, human created environments, such as urban areas, represent a formidable  
44 challenge for organisms because the magnitude and pace of the environmental alterations  
45 imposed by humans usually exceed their limits of tolerance leading to populations shrinkage and  
46 extinction [6,8]. Urban challenges include combating chemical [3], acoustic [9,10] and light pollution  
47 [11, 12], human disturbance [6,13], new pathogens [14,15] and predators [16,17], and human  
48 infrastructures [16,18]. However, some species are able to overcome these challenges and thrive  
49 in urban environments [4,8,13]. Therefore, a key question in urban ecology is how species cope  
50 with urbanization. Countless studies have demonstrated that adapting to urban environments imply  
51 some kind of phenotypical differentiation from non-urban relatives [8-10,13]. Indeed, organisms are  
52 forced to adjust their physiology, behaviour and life histories to the novel conditions imposed by  
53 the city [6,8]. However, the mechanisms underlying the differences between urban and non-urban  
54 dwellers remain largely unknown [7,8]. Observed adjustments are mostly consistent with  
55 phenotypically plastic responses [13], but individual sorting and microevolutionary changes by  
56 divergent selection could be playing a role [4,6,8]. Perhaps, our inability to disentangle these  
57 mechanisms comes from a deficit of experimental studies in urban ecology [10], in spite of the fact  
58 that human transformed environments provide often ready-made experiments. The current spread  
59 of the novel coronavirus disease (COVID-19) and its consequences represents an excellent  
60 example, as we are involuntarily involved in a major unintended social experiment.

61 After the declaration of the COVID-19 pandemic in March 2020 by the World Health  
62 Organization, most countries have implemented social and health measures unprecedented in  
63 recent history. These measures, aimed at containing the virus spread [19-23], have focused on  
64 social distancing and population confinement, as well as the cease of non-essential productive and  
65 social activities. Overall, the measures have contributed to a global diminishing of human activities  
66 [24]. This abrupt and dramatic disruption of most human social and economic activities have  
67 already had quantifiable effects on urban environments by marked reductions in air pollution [25-  
68 27] and noise [28,29]. One of the most noticeable and generalized measure has been applying  
69 certain degree of population lockdown, which renders our city streets empty and virtually silent.  
70 This situation provides a once-in-a-lifetime opportunity to study urban wildlife responses to less  
71 active, noisy and polluted cities and gain unprecedented mechanistic insights into how human  
72 activities affect wildlife [24,30,31]. Product of the human lockdown, unusual observations of animals

73 in urban areas worldwide have flooded the media and the internet planting in the social imaginary  
74 the idea that “nature is getting back its space” (*sensu* [32]). Although plausible, this idea is, in most  
75 cases, based on anecdotal records, sometimes false [32], without any quantitative scientific  
76 investigation supporting such claim [24].

77 In this work, we aimed to assess the behavioural responses of birds to the unexpected and  
78 drastic changes occurring in urban environments resulting from the COVID-19 lockdown in a  
79 densely populated area of north eastern Spain (Catalonia). Following China [23] and Italy [20],  
80 Spain was the third country worldwide to impose a heavy population lockdown to stop COVID-19  
81 spread. The declaration of the national emergency in March 14<sup>th</sup> 2020 by the Spanish Government  
82 imposed the strictest lockdown measures in Europe. Since then, social restrictions were alleviated  
83 progressively until the end of June (electronic supplementary material, figure S1, table S1). As in  
84 other parts of the world, this big halt of human activities has had significant environmental effects  
85 with reduced air contamination and noise in Spanish cities [26,27]. The severity of the lockdown  
86 measures imposed in Spain, make this country especially suitable to study COVID-19 lockdown  
87 effects in urban fauna, as they enjoyed exceptionally quieter and peaceful towns and cities during  
88 many weeks.

89 We compared bird records collected during the first four weeks of the lockdown in towns  
90 and cities of Catalonia with the available records for the same region and dates since 2015. These  
91 historical records were used as baseline data. Our broad scale approach (hundreds of study sites  
92 covering an area of 32,000 km<sup>2</sup>) at community level (we studied 16 different species) allowed us  
93 a robust testing of two key questions:

94 1) Did urban birds become more common in response to human empty cities? It can be  
95 predicted that decreased human presence and disturbance allowed animals to occupy spaces that  
96 used to be above their fear tolerance thresholds [6,32]. Therefore, we expected a higher occurrence  
97 in 2020 compared to the historical records for the same urban areas. This effect being likely  
98 stronger for shier species (i.e., urban adapters), who are less tolerant to human disturbances [6,13].

99 2) Were urban birds more detectable as a consequence of quieter cities? It can be predicted  
100 that decreased anthropogenic noise increased the effective distance of among bird  
101 communications [6,9,10,13] and be more easily perceived by observers [33,34]. Moreover, as the  
102 masking effect of human acoustic contamination mostly disappeared, we expected an increase in  
103 singing activity, including potential shifts in its timing, to profit from the new urban soundscape  
104 [9,10,35,36]. Therefore, we expected a higher detectability of urban birds during the lockdown than  
105 in previous years, with possible changes in the daily patterns of detection.

106

107

108 **2. Material and methods**

109 *a) Bird data*

110 On March 14<sup>th</sup> 2020, the Spanish Government declared the national emergency due to COVID-19  
111 outbreak and imposed severe social restrictions. These restrictions included mandatory and  
112 permanent confinement of the population, borders closure, limitations in public transport, on-line  
113 education, working from home whenever possible, and closure of non-essential business and  
114 public services, such as supermarkets, pharmacies or hospitals. One day later, we launched the  
115 project “#JoEmQuedoACasa” (I stay at home) within the citizen science on-line platform *ornitho*  
116 ([www.ornitho.cat](http://www.ornitho.cat)). This platform aims to collect wildlife records in Catalonia (NE Spain) from  
117 birdwatchers and naturalists to improve the biodiversity knowledge of the region. *Ornitho* has been  
118 running since 2009 and has gathered more than 6.5 million records to date. The project launched  
119 during the lockdown aimed to collect information about wildlife responses to the new environmental  
120 conditions resulting from people confinement. In addition to this valuable information, the project  
121 was important to keep engaged birdwatchers in this citizen science program by encouraging them  
122 to continue complete checklists (checklist with all identified species) submission, even during a  
123 period of constrained outdoor activities [37].

124 Lockdown surveys were conducted between March 15<sup>th</sup> and April 13<sup>th</sup> of 2020. During  
125 these four weeks, people was subjected to the most restrictive conditions of mobility and  
126 consequently this period showed the most drastic reduction of human activities (electronic  
127 supplementary material, figure S1, table S1). Therefore, lockdown checklists were carried out only  
128 from homes (e.g., balconies, rooftops or yards) in urban environments. To determine the effect of  
129 lockdown on bird behaviour, we also gathered all complete checklists uploaded to *ornitho* recorded  
130 during the same dates between 2015 and 2019. We classified these surveyed sites as urban or  
131 non-urban according to the 2017 land use/land cover map of Catalonia [38]. Therefore, we obtained  
132 three groups of checklists: urban lockdown, historical urban, and historical non-urban, which  
133 contained a total of 126,315 bird records. Historical urban data represented baseline data, while  
134 historical non-urban data was included as control data without human disturbances.

135 All checklists had associated basic information about the survey: site (geographical  
136 coordinates), date, hour, time invested (which was used as a proxy for sampling effort) and  
137 observer identity. We excluded checklists lasting >3 h, as they might be discontinuous surveys. We  
138 also excluded those checklists started one hour earlier or later than dawn or sunset, respectively,  
139 as they represented nocturnal surveys. To correct for the adjustment of daylight saving time at the  
140 end of March, we rescaled recorded hours in civil time to the relevant daily sun events: dawn, noon  
141 and sunset, which were established as -1, 0 and 1, respectively. Dawn, noon and sunset were  
142 calculated for every geographical coordinate and date by the ‘suncalc’ library (version 0.5.0) for R  
143 software [39]. Rescaling was calculated as the quotient between the difference of noon and

144 checklist hour and the difference of dawn or sunset and checklist hour, depending on whether  
145 checklist started earlier or later than noon, respectively. This transformation allowed to fix the small  
146 bias caused by the longitudinal differences in dawn and sunset across Catalonia as well as by the  
147 progressive day length increase during the study period. Not many observers recorded the number  
148 of individuals for each species. For this reason, we opted to work with presence/absence data.

149 During the lockdown, observers recorded 1,289 complete bird checklists at 149 sites. The  
150 number of replicated surveys per site and observer ranged from 1 to 91 (mean=8.7, SD=12.4).  
151 Historical records in urban areas were the scarcest: 1,062 checklists in 410 sites with up to 48  
152 replicates per site (mean=2.6, SD=5.2). As expected, data from non-urban areas were the most  
153 abundant, as observers usually preferred birdwatching in wild habitats. We gathered 5,849  
154 checklists from 3,113 sites. Although one observer made 84 replicates for the same site, on  
155 average, observers in this group showed the lowest site fidelity (mean replicates=1.9, SD=3.6).

156 We selected data for the 16 most common sedentary urban species in Catalonia [40,41]  
157 (see figure 1). We focused only on sedentary birds to avoid seasonal changes in occurrence and  
158 abundance associated with migration. Data from the common and the spotless starlings (*Sturnus*  
159 *vulgaris* and *S. unicolor*, respectively) were merged as *Sturnus* spp. as both were not usually  
160 identified at species level in most observations due to their high resemblance [42]. Both species  
161 are common, well spread, sympatric and share similar habits and behaviour [41]. Thus, we did not  
162 expect important differences in their occurrence or detectability.

### 163 *b) Statistical analyses*

164 To disentangle the effects of individuals' presence (first question) and detection (second question)  
165 in our bird data, we used hierarchical occupancy models [43,44]. We considered as replicated  
166 surveys those checklists reported by the same observer within the same 1x1 km UTM cell. By  
167 combining observer and location, we avoided variability in detection rates due to observer  
168 expertise. We could assume confidently that observer experience was randomly distributed across  
169 our study area. The equations defining our model were:

170

$$171 \quad \text{logit}(\Psi_j) = \beta_0 + \beta_1 \text{group}_{Lj} + \beta_2 \text{group}_{Uj} + \beta_3 \text{group}_{Nj}$$

$$172 \quad \text{logit}(\rho_i) = \alpha_0 + \alpha_1 \text{group}_{Li} + \alpha_2 \text{group}_{Ui} + \alpha_3 \text{group}_{Ni} + \alpha_4 \text{time}_i + \alpha_5 \text{time}_i \cdot \text{group}_{Li}$$

$$173 \quad + \alpha_6 \text{time}_i \cdot \text{group}_{Ui} + \alpha_7 \text{time}_i \cdot \text{group}_{Ni} + \alpha_8 f(\text{hour}_i) + \alpha_9 f(\text{hour}_i)$$

$$174 \quad \cdot \text{group}_{Li} + \alpha_{10} f(\text{hour}_i) \cdot \text{group}_{Ui} + \alpha_{11} f(\text{hour}_i) \cdot \text{group}_{Ni}$$

175

176 where  $\Psi_j$  is the occurrence of a species at site  $j$  and  $\rho_i$  is its detectability in the checklist  $i$ ; groups  
177  $L$ ,  $U$  and  $N$  refer to lockdown, urban historical and non-urban, respectively; time refers to the  
178 duration of the survey; and hour refers to the starting hour. Hour was included as an unpenalized  
179 thin plate regression spline basis function ( $f$ ) with five degrees of freedom because we expected  
180 that detectability could vary in a non-linear way along the day [45,46]. Interactions between group  
181 and time and between group and hour allowed to model the effect of these two variables on  
182 detectability within each group. To test the significance of hour and interactions, we used log  
183 likelihood ratio tests. Basis functions were built by the `smooth.construct` function from package  
184 'mgcv' (version 1.8-22 [47]), while occupancy models were run with the `occu` function of package  
185 'unmarked' (version 0.12-3 [48]) for R.

186

187

### 188 **3. Results**

189 Probability of occurrence of a species during the lockdown did not differ significantly from the  
190 occurrence recorded in urban areas in previous years in 12 out of the 16 studied species after  
191 accounting for their imperfect detection (figure 1; electronic supplementary material, table S2). In  
192 the four species with significant differences, three increased their occurrence and one decreased  
193 it. As expected, most of the species (10) showed significant differences in their occurrence between  
194 lockdown and non-urban checklists (electronic supplementary material, table S2). On average,  
195 these species were approximately a 15% more common in the lockdown checklists than in the non-  
196 urban checklists, confirming that most of the studied species were preferentially urban dwellers.

197 For most species (10), probability of detection was higher in lockdown checklists than in  
198 historical urban ones, but this difference was not statistically significant in most cases (electronic  
199 supplementary material, figure S2, table S3). However, most species were less detectable in non-  
200 urban checklists than in urban ones.

201 As we predicted, detectability varied along the day in a non-linear way for all species (figure  
202 2; electronic supplementary material, figure S3). Excepting two species, the pattern of daily  
203 variation in detectability was significantly different among groups (electronic supplementary  
204 material, table S4). A difference consistently found in most species was higher detectability in the  
205 first hours of the morning during the lockdown compared to the urban records from previous years  
206 (figure 2, 3). In most species, during the lockdown detectability peaked at dawn and decreased  
207 until midday, while in the historical urban checklists the peak of detectability was around mid-  
208 morning. In fact, the pattern of detectability along the day in the lockdown group resembled more  
209 to the non-urban pattern than to the urban pattern in many species. Predicted detectability at dawn

210 by our models in the lockdown group was on average a 27% higher than in the urban group (sign  
211 test:  $Z=3.25$ ,  $p$ -value=0.001; figure 3).

212 As expected, in all but one species, chances of detection increased with longer surveys  
213 (electronic supplementary material, figure S4, table S5). In most of them (11), such time effect was  
214 significantly different among groups (electronic supplementary material, table S4), demonstrating  
215 that increasing the sampling time does not always imply the same increase in a species' chances  
216 of detection. For half of the species, time effect was significantly lower in the lockdown group than  
217 in the historical urban group (mean reduction of 17%; electronic supplementary material, table S5).  
218 This systematic reduction contrasts with the comparison of time effect between lockdown and non-  
219 urban groups, where for nine species there were significant differences between both groups, but  
220 such differences were disparate (mean change -0.8%; electronic supplementary material, table  
221 S5).

222

223

## 224 **Discussion**

225 Birds did not occur in higher rates in towns and cities during the lockdown than before it, non-  
226 supporting the hypothesis that birds moved into the human emptied urban areas [32]. As the  
227 changes induced by the COVID-19 lockdown were drastic and sudden and did not last enough,  
228 they probably did not allow for colonization processes. The few species with a significant increase  
229 of their prevalence in urban surveys during lockdown were, interestingly, the ones that are mostly  
230 urban. As these species are not present in large numbers away from urban areas, they could hardly  
231 rely on non-urban source populations to occupy cities and towns during the lockdown.

232 Birds changed their detectability pattern as a consequence of the lockdown. In general,  
233 there was an increase in detection probability, which was especially marked in the early morning.  
234 As observed in non-urban habitats, detectability during the lockdown decreased from dawn  
235 onwards, while at the same urban locations detectability was historically low at dawn and increased  
236 until reaching a peak two or three hours later. It is interesting to note that the Eurasian blackbird, a  
237 model species in urban ecology studies [8,9,13,49,50], was the only exception to this pattern.  
238 Overall, many species showed a "wilder" pattern of detection during the lockdown in urban areas.

239 Urban birds during lockdown may have shown this detectability peak at dawn, typical of  
240 non-urban habitats, because of a rapid behavioural response to adapt to the new environmental  
241 conditions imposed by the COVID-19 measures [51]. Birds rely heavily on acoustic communication.  
242 During reproduction, males sign to attract females and defend their territories, becoming highly  
243 conspicuous and detectable. COVID-19 lockdown was imposed just at the beginning of the  
244 breeding season, when singing activity was expected to be especially high [52]. Therefore, there



245 was a strong pressure to time singing activity to the optimal moment of the day. This moment is  
246 dawn because the physical properties of the atmosphere enhance acoustic transmission [53,54]  
247 and consequently, birds can reach the maximum audience. Thus, urban birds during the lockdown  
248 may have advanced their main period of singing activity to dawn, increasing their detection at those  
249 hours, similar to what is observed in non-urban areas.

250 During the lockdown, human presence and activities decreased drastically (electronic  
251 supplementary material, figure S1, table S1), being this especially notable during rush hour, which  
252 virtually disappeared [27]. During the spring in Spain, morning rush hour matches with the first  
253 hours of light, when birds are expected to be especially communicative [36,50,55]. The dramatic  
254 decrease in noise during the lockdown released early morning acoustic space that could be  
255 recovered by the dawn chorus. Empirical and experimental evidence demonstrates that urban birds  
256 avoid the masking effect of anthropogenic noise [9,10,35,36,56]. Our findings match these previous  
257 studies, but instead of advancing the dawn chorus [36,49,50,57], our historical urban data suggests  
258 that birds would delay their peak of activity (and consequently of detectability) to mid-morning. In  
259 our study context, this can be explained because civil and solar time are heavily decoupled in Spain  
260 since the country is located in the westernmost part of its time zone [58]. For this reason, if birds in  
261 Catalonia advance their activities before sunrise, they would be still suffering an important overlap  
262 with morning noisy human activities, such as commuting, school attendance, shop opening, etc.  
263 [50,55]. Hence, the best option for birds would be to delay the peak of activity to after the morning  
264 rush hour [56]. Moreover, most of the previous studies have been carried out in more northern  
265 latitudes [9,49,59], where climate conditions can still be severe at night in early spring. Under these  
266 circumstances, individual survival can be challenged by a strong nocturnal energy demand [60,61].  
267 There, dawn singing can become a relevant and honest signal of phenotypic quality of males, as  
268 only those individuals in best physical condition can undergo dawn fasting [49]. In Mediterranean  
269 regions, where spring nights are mild, the role of dawn singing as signal of male quality might be  
270 less important. Attracting mates would be the prime objective for singing and consequently, males  
271 would be more pressed to place this activity when interference of anthropogenic noise is at its  
272 lowest. Since sunrise, these lowest levels of noise are just after the morning rush hours (i.e. later  
273 than 9 a.m.), when the air physical properties still keep sound attenuation and fluctuation low [53].

274 If birds have changed their behaviour, this adaptive, flexible behavioural response must  
275 have been mediated by phenotypic plasticity. Lockdown was sudden and the environmental  
276 scenario in urban areas changed radically from one day to the next (electronic supplementary  
277 material, figure S1) [27]. This unprecedented social experiment imposed by the COVID-19 allowed  
278 us to test and support the hypothesis of the high plasticity displayed by individuals living in urban  
279 areas in order to cope with a constantly changing environment [6-8,51]. However, this fast adaptive  
280 response might have been facilitated by a previous conditioning of birds to weekly rhythms of



281 human activities. Birds change their behaviour from working to weekend days [35,56,62] to match  
282 with human behaviours. Therefore, birds could assimilate the lockdown as a very long and  
283 especially peaceful weekend. Nevertheless, it would be interesting to explore the long-lasting  
284 consequence at a community level of this environmental change [59]. Weekends are just two days  
285 long, while strict people lockdown lasted for at least two months in most regions of Spain. One may  
286 speculate that bolder and fast-adapting species would adapt their behaviour on a weekly basis.  
287 However, during the lockdown, all species had enough time to adapt to the long-lasting new  
288 conditions. In fact, as we have demonstrated, all of them modified their daily patterns of  
289 detectability. Maybe the most urbanite species have benefited the least of this lockdown as their  
290 boldness and higher human tolerance was no longer an advantage in empty cities.

291 In addition to the birds' rapid behavioural response to the anomalous environmental  
292 conditions during the lockdown, observers had certainly enhanced opportunities to detect birds  
293 during this period. Urban areas were quieter than usual [27-29], improving the chances of listening  
294 the birds [32-34,53]. Moreover, absence of people outdoors allowed for the display of shy and  
295 distrustful behaviours [6], facilitating bird observations, especially for those less singing species, as  
296 the magpie *Pica pica* or the yellow-legged gull *Larus michahellis*. However, these improved  
297 conditions for urban birdwatching were heavily constrained by the fact that observers were forced  
298 to stay at their homes and their sampling area was reduced to what they could see from their  
299 balconies, yards or rooftops. Therefore, improved detection was to some extent counterbalanced  
300 by the limited scope from the survey sites. The observed effect in increased sampling time would  
301 support this hypothesis, as we demonstrated that the discovery rate in most species was slower  
302 during the lockdown surveys than in the historical urban ones.

303 The differences observed between urban and non-urban environments were expected as  
304 habitat configuration and bird densities are patently different between them. In fact, populations of  
305 urban exploiter birds show usually higher densities in cities than in rural or natural close areas [6-  
306 8], facilitating their detection in urban areas. Such differences may have serious consequences for  
307 monitoring schemes aiming to quantify wildlife occurrence and abundance by standardized  
308 protocols, as the assumption of equal detectability under similar circumstances is usually violated  
309 [33,44,45,63]. For instance, one sampling hour at dawn is not equivalent in terms of chances to  
310 detect a species in urban and non-urban habitats. Traditional protocols assume that the best  
311 moment to detect birds is early morning [53,64], which is actually true, but apparently only in natural  
312 conditions without human disturbance, as we have demonstrated here (see figure 2). If the  
313 detectability peak in most urban populations is reached at mid-morning, their abundance would be  
314 systematically underestimated by usual sampling protocols based on early morning bird surveys.  
315 As there is an increased awareness about the importance of urban bird populations [40], it is  
316 necessary to ensure its accurate quantification, which may imply a redefinition of the most popular

317 current census techniques [8]. Additionally, in this work we demonstrated the utility of occupancy  
318 models and the necessity to account for imperfect detection [45,46].

319         The COVID-19 lockdown is revealing the stress, noise and pollution present in urban areas  
320 [25,26,28,29]. Under normal conditions, bird behaviour is altered and the possibility to enjoy the  
321 natural values of our cities is notably diminished [8]. Our society should reflect on our urban lifestyle  
322 and how it affects welfare of urban fauna and jeopardizes its conservation. As the world is becoming  
323 more urbanized and animals will be forced to live more often in anthropogenic environments [6-8],  
324 one way to ensure their adaptation as urban dwellers would be by reducing our noisier and more  
325 disturbing activities. Most importantly, not only urban populations of non-human animals would be  
326 benefited, but also ourselves from quieter, more peaceful and less polluted cities.

327

328

329 **Authors' contributions**

330 G.G. has the original idea and designed the monitoring program. O.G. and G.G. formulated formal  
331 hypotheses, and collected and arranged the necessary data for the study. O.G. analysed data.  
332 O.G. wrote the manuscript, with contributions from all the authors.

333 **Competing Interest**

334 The authors declare no competing interests.

335 **Funding**

336 This study did not receive any funding.

337 **Acknowledgments**

338 We warmly thanks to the thousands of observers who shared their observations by *ornitho* website,  
339 for their long-term involvement in this project, and the special efforts undertaken during the  
340 lockdown. *Ornitho* project is supported by the Generalitat de Catalunya. Margarida Barceló-Serra  
341 provided valuable English edits and suggestions.

342

343

## 344 References

- 345 1. Seto KC, Güneralp B, Hutyra LR. 2012 Global forecasts of urban expansion to 2030 and direct impacts  
346 on biodiversity and carbon pools. *Proc. Natl. Acad. Sci. U.S.A.* **109**,16083–16088.  
347 (doi:10.1073/pnas.1211658109)
- 348 2. Grimm NB, *et al.* 2008 Global change and the ecology of cities. *Science* **319**, 756–760.  
349 (doi:10.1126/science.1150195)
- 350 3. Pickett ST, *et al.* 2011 Urban ecological systems: Scientific foundations and a decade of progress. *J.*  
351 *Environ. Manage.* **92**, 331–362. (doi:10.1016/j.jenvman.2010.08.022)
- 352 4. McDonnell MJ, Hahs AK. 2015 Adaptation and adaptedness of organisms to urban environments.  
353 *Annu. Rev. Ecol. Evol. S.* **46**, 261–280. (doi:10.1146/annurev-ecolsys-112414-054258)
- 354 5. Sol D, Lapiedra O, González-Lagos C. 2013 Behavioural adjustments for a life in the city. *Anim.*  
355 *Behav.* **85**, 1101–1112. (doi:10.1016/j.anbehav.2013.01.023)
- 356 6. Isaksson C. 2018 Impact of urbanization on birds. In *Bird species. How they arise, modify and vanish*  
357 (ed. DT Tietze), pp 235–257. Cham, Switzerland: Springer. (doi:10.1007/978-3-319-91689-7\_13)
- 358 7. Murgui E, Hedblom M. 2017 *Ecology and conservation of birds in urban environments*. Cham,  
359 Switzerland: Springer. (doi: 10.1007/978-3-319-43314-1)
- 360 8. Slabbekoorn H, Ripmeester EA. 2007 Birdsong and anthropogenic noise: implications and applications  
361 for conservation. *Mol. Ecol.* **17**, 72–83. (doi:10.1111/j.1365-294X.2007.03487.x)
- 362 9. Ortega CP. 2012 Effects of noise pollution on birds: A brief review of our knowledge. *Ornithol. Monogr.*  
363 **74**, 6–22. (doi:10.1525/om.2012.74.1.6)
- 364 10. Rich C, Longcore T. 2006 *Ecological consequences of artificial night lighting*. Washington, DC: Island  
365 Press.
- 366 11. Gaston KJ, Bennie J, Davies TW, Hopkins J. 2013 The ecological impacts of nighttime light pollution: a  
367 mechanistic appraisal. *Biol. Rev.* **88**, 912–927. (doi:10.1111/brv.12036)
- 368 12. Lowry H, Lill A, Wong BB. 2013 Behavioural responses of wildlife to urban environments. *Biol. Rev.* **88**,  
369 537–549. (doi:10.1111/brv.12012)
- 370 13. Bradley CA, Altizer S. 2007 Urbanization and the ecology of wildlife diseases. *Trends Ecol. Evol.* **22**,  
371 95–102. (doi:10.1016/j.tree.2006.11.001)
- 372 14. Jiménez-Peñuela J, Ferraguti M, Martínez-de la Puente J, Soriguer R, Figuerola J. 2019 Urbanization  
373 and blood parasite infections affect the body condition of wild birds. *Sci. Total Environ.* **651**, 3015–  
374 3022. (doi:10.1016/j.scitotenv.2018.10.203)
- 375 15. Loss SR, Will T, Marra PP. 2015 Direct mortality of birds from anthropogenic causes. *Annu. Rev. Ecol.*  
376 *Evol. S.* **46**, 99–120. (doi:10.1146/annurev-ecolsys-112414-054133)
- 377 16. Pavisse R, Vangeluwe D, Clergeau P. 2019 Domestic cat predation on garden birds: An analysis from  
378 European ringing programmes. *Ardea* **107**, 103–109. (doi:10.5253/arde.v107i1.a6)
- 379 17. Aymí R, González Y, López T, Gordo O. 2017 Bird-window collisions in a city on the Iberian  
380 Mediterranean coast during autumn migration. *Rev. Cat. Ornitol.* **33**, 17–28.
- 381 18. Anderson RM, Heesterbeek H, Klinkenberg D, Hollingsworth TD. 2020 How will country-based  
382 mitigation measures influence the course of the COVID-19 epidemic? *Lancet* **395**, 931–934.  
383 (doi:10.1016/S0140-6736(20)30567-5)
- 384 19. Gatto M, *et al.* 2020 Spread and dynamics of the COVID-19 epidemic in Italy: Effects of emergency  
385 containment measures. *Proc. Natl. Acad. Sci. U.S.A.* **117**, 10484–10491.  
386 (doi:10.1073/pnas.2004978117)
- 387 20. Aleta A, Moreno Y. 2020 Evaluation of the potential incidence of COVID-19 and effectiveness of  
388 containment measures in Spain: a data-driven approach. *BMC Med.* **18**, 157. (doi:10.1186/s12916-  
389 020-01619-5)
- 390 21. Kraemer MU, *et al.* 2020 The effect of human mobility and control measures on the COVID-19  
391 epidemic in China. *Science* **368**, 493–497. (doi:10.1126/science.abb4218)
- 392 22. Rutz C, *et al.* 2020 COVID-19 lockdown allows researchers to quantify the effects of human activity on  
393 wildlife. *Nat. Ecol. Evol.* **4**, 1156–1159. (doi:10.1038/s41559-020-1237-z)
- 394 23. Venter ZS, Aunan K, Chowdhury S, Lelieveld J. 2020 COVID-19 lockdowns cause global air pollution  
395 declines. *Proc. Natl. Acad. Sci. U.S.A.* **117**, 18984–18990. (doi:10.1073/pnas.2006853117)

- 396 24. Briz-Redón Á, Belenguer-Sapiña C, Serrano-Aroca Á. 2021 Changes in air pollution during COVID-19  
397 lockdown in Spain: a multi-city study. *J. Environ. Sci.* **101**, 16–26. (doi:10.1016/j.jes.2020.07.029)
- 398 25. Aloí A, *et al.* 2020 Effects of the COVID-19 lockdown on urban mobility: Empirical evidence from the  
399 city of Santander (Spain). *Sustainability* **12**, 3870. (doi:10.3390/su12093870)
- 400 26. Lecocq T, *et al.* 2020 Global quieting of high-frequency seismic noise due to COVID-19 pandemic  
401 lockdown measures. *Science* **369**, 1338–1343. (doi:10.1126/science.abd2438)
- 402 27. Aletta F, Oberman T, Mitchell A, Tong H, Kang J. 2020 Assessing the changing urban sound  
403 environment during the COVID-19 lockdown period using short-term acoustic measurements. *Noise*  
404 *Mapping* **7**, 123–134. (doi:10.1515/noise-2020-0011)
- 405 28. Corlett RT, *et al.* 2020 Impacts of the coronavirus pandemic on biodiversity conservation. *Biol.*  
406 *Conserv.* **246**, 108571. (doi:10.1016/j.biocon.2020.108571)
- 407 29. Bates AE, Primack RB, Moraga P, Duarte CM. 2020 COVID-19 pandemic and associated lockdown as  
408 a “Global Human Confinement Experiment” to investigate biodiversity conservation. *Biol. Conserv.* **248**,  
409 108665. (doi:10.1016/j.biocon.2020.108665)
- 410 30. Manenti R, *et al.* 2020 The good, the bad and the ugly of COVID-19 lockdown effects on wildlife  
411 conservation: Insights from the first European locked down country. *Biol. Conserv.* **249**, 108728.  
412 (doi:10.1016/j.biocon.2020.108728)
- 413 31. Simons TR, Alldredge MW, Pollock KH, Wettröth JM. 2007 Experimental analysis of the auditory  
414 detection process on avian point counts. *Auk* **124**, 986–999. (doi:10.1093/auk/124.3.986)
- 415 32. Pacifici K, Simons TR, Pollock KH. 2008 Effects of vegetation and background noise on the detection  
416 process in auditory avian point-count surveys. *Auk* **125**, 600–607. (doi:10.1525/auk.2008.07078)
- 417 33. Díaz M, Parra A, Gallardo C. 2011 Serins respond to anthropogenic noise by increasing vocal activity.  
418 *Behav. Ecol.* **22**, 332–336. (doi:10.1093/beheco/arq210)
- 419 34. Gil D, Honarmand M, Pascual J, Pérez-Mena E, Macías García C. 2015 Birds living near airports  
420 advance their dawn chorus and reduce overlap with aircraft noise. *Behav. Ecol.* **26**, 435–443.  
421 (doi:10.1093/beheco/aru207)
- 422 35. Rose S, Suri J, Brooks M, Ryan PG. 2020 COVID-19 and citizen science: lessons learned from  
423 southern Africa. *Ostrich* **91**, 188–191. (doi:10.2989/00306525.2020.1783589)
- 424 36. González-Guerrero O, Pons X. 2020 The 2017 Land Use/Land Cover Map of Catalonia based on  
425 Sentinel-2 images and auxiliary data. *Spanish J. Remote Sens.* **55**, 81–92.  
426 (doi:10.4995/raet.2020.13112)
- 427 37. R Core Team. 2017 *R: A Language and Environment for Statistical Computing* (version 3.4.3). Vienna,  
428 Austria: R Foundation for Statistical Computing. See <https://www.Rproject.org/>
- 429 38. Herrando S, Weiserbs A, Quesada J, Ferrer X, Paquet JI. 2012 Development of an urban bird  
430 indicator: using data from monitoring schemes in two large European cities. *Anim. Biodivers. Conserv.*  
431 **35**, 141–150.
- 432 39. Estrada J, Pedrocchi V, Brotons L, Herrando S. 2004 *Atlas dels ocells nidificants de Catalunya 1999-*  
433 *2002*. Barcelona, Spain: ICO-Lynx.
- 434 40. Shirihaï H, Svensson L. 2018 *Handbook of Western Palearctic Birds, Volume II: Flycatchers to*  
435 *Buntings*. London, UK: Helm.
- 436 41. MacKenzie DI, Nichols JD, Royle JA, Pollock KH, Bailey LL, Hines JA. 2006 *Occupancy estimation and*  
437 *modeling: Inferring patterns and dynamics of species occurrence*. Amsterdam: Elsevier.
- 438 42. Altwegg R, Nichols JD. 2019 Occupancy models for citizen-science data. *Methods Ecol. Evol.* **10**, 8–  
439 21. (doi:10.1111/2041-210X.13090)
- 440 43. Schmidt JH, McIntyre CL, MacCluskie MC. 2013 Accounting for incomplete detection: What are we  
441 estimating and how might it affect long-term passerine monitoring programs? *Biol. Conserv.* **160**, 130–  
442 139. (doi:10.1016/j.biocon.2013.01.007)
- 443 44. Johnston A, Fink D, Hochachka WM, Kelling S. 2018 Estimates of observer expertise improve species  
444 distributions from citizen science data. *Methods Ecol. Evol.* **9**, 88–97 (doi:10.1111/2041-210X.12838)
- 445 45. Wood SN. 2017 *Generalized Additive Models: An Introduction with R*. Boca Raton, FL: CRC Press.
- 446 46. Fiske I, Chandler R. 2011 unmarked: An R package for fitting hierarchical models of wildlife occurrence  
447 and abundance. *J. Stat. Softw.* **43**, 1–23. (doi:10.18637/jss.v043.i10)

- 448 47. Nordt A, Klenke R. 2013 Sleepless in town—drivers of the temporal shift in dawn song in urban  
449 European blackbirds. *PLoS ONE* **8**, e71476. (doi:10.1371/journal.pone.0071476)
- 450 48. Sierra J, Schloesing E, Pavón I, Gil D. 2017 European blackbirds exposed to aircraft noise advance  
451 their chorus, modify their song and spend more time singing. *Front. Ecol. Evol.* **5**, 68  
452 (doi:10.3389/fevo.2017.00068)
- 453 49. Derryberry EP, Phillips JN, Derryberry GE, Blum MJ, Luther D. *In press* Singing in a silent spring: Birds  
454 respond to a half-century soundscape reversion during the COVID-19 shutdown. *Science*.  
455 (doi:10.1126/science.abd5777)
- 456 50. Gordo O, Sanz JJ, Lobo JM. 2008 Geographic variation in onset of singing among populations of two  
457 migratory birds. *Acta Oecol.* **34**, 50–64. (doi:10.1016/j.actao.2008.03.006)
- 458 51. Richards DG. 1981 Environmental acoustics and censuses of singing birds. *Stud. Avian Biol.* **6**, 297–  
459 300.
- 460 52. Brown TJ, Handford P. 2003 Why birds sing at dawn: the role of consistent song transmission. *Ibis*  
461 **145**, 120–129. (doi:10.1046/j.1474-919X.2003.00130.x)
- 462 53. Arroyo-Solís A, Castillo JM, Figueroa E, López-Sánchez JL, Slabbekoorn H. 2013 Experimental  
463 evidence for an impact of anthropogenic noise on dawn chorus timing in urban birds. *J. Avian Biol.* **44**,  
464 288–296. (doi:10.1111/j.1600-048X.2012.05796.x)
- 465 54. Cartwright LA, Taylor DR, Wilson DR, Chow-Fraser P. 2014 Urban noise affects song structure and  
466 daily patterns of song production in Red-winged Blackbirds (*Agelaius phoeniceus*). *Urban Ecosyst.* **17**,  
467 561–572. (doi:10.1007/s11252-013-0318-z)
- 468 55. Fuller RA, Warren PH, Gaston KJ. 2007 Daytime noise predicts nocturnal singing in urban robins. *Biol.*  
469 *Lett.* **3**, 368–370. (doi:10.1098/rsbl.2007.0134)
- 470 56. Planesas P. 2013 La hora oficial en España y sus cambios. *Anuario del Observatorio Astronómico de*  
471 *Madrid* **1**, 373–404.
- 472 57. Shannon G, *et al.* A synthesis of two decades of research documenting the effects of noise on wildlife.  
473 *Biol. Rev.* **91**, 982–1005. (doi:10.1111/brv.12207)
- 474 58. Houston AI, McNamara JM. 1993 A theoretical investigation of the fat reserves and mortality levels of  
475 small birds in winter. *Ornis Scandinavica* **24**, 205–219. (doi:10.2307/3676736)
- 476 59. Villén-Pérez S, Carrascal LM, Gordo O. 2014 Wintering forest birds roost in areas of higher sun  
477 radiation. *Eur. J. Wildlife Res.* **60**, 59–67. (doi:10.1007/s10344-013-0750-7)
- 478 60. Bautista LM *et al.* 2004 Effect of weekend road traffic on the use of space by raptors. *Conserv. Biol.*  
479 **18**, 726–732. (doi:10.1111/j.1523-1739.2004.00499.x)
- 480 61. Guillera-Arroita G, Lahoz-Monfort JJ, MacKenzie DI, Wintle BA, McCarthy MA. 2014 Ignoring imperfect  
481 detection in biological surveys is dangerous: A response to ‘Fitting and interpreting occupancy models’.  
482 *PLoS ONE* **9**, e99571. (doi:10.1371/journal.pone.0099571)
- 483 62. Herrando S, Estrada J, Brotons L, Guallar S. 2016 Do common bird winter censuses produce similar  
484 results when conducted in the morning and in the afternoon? *Rev. Cat. Ornitol.* **22**, 14–20.
- 485
- 486

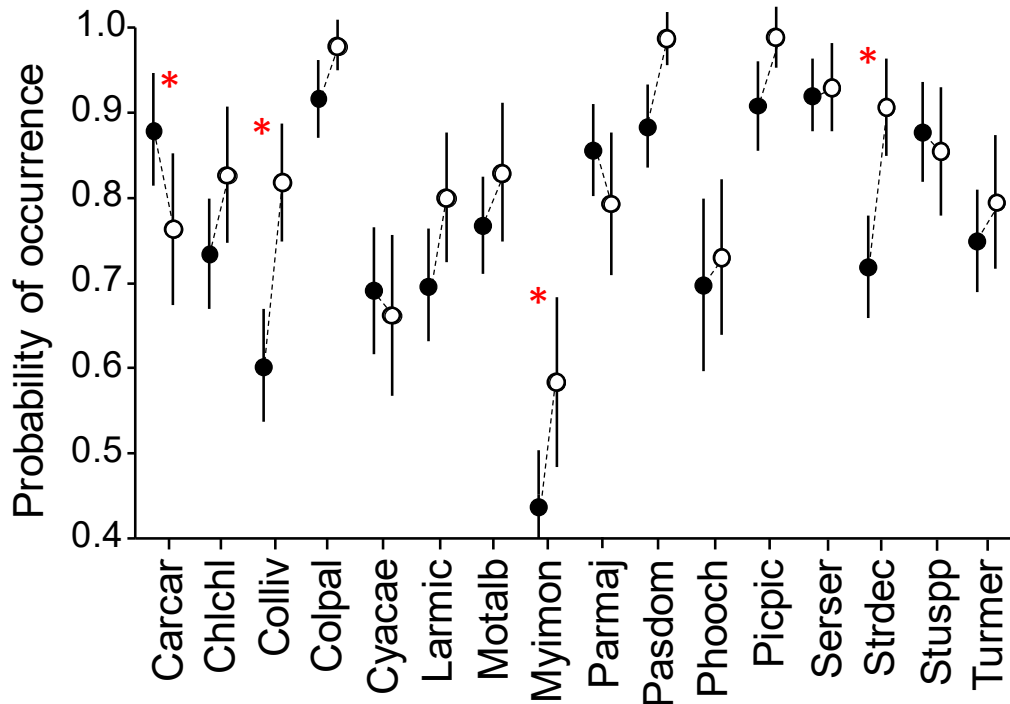

487

488 **Figure 1.** Probability of occurrence of birds in urban areas before (2015-19, black dots) and during  
489 (2020; white dots) the COVID-19 lockdown. Asterisks indicate significant differences ( $p$ -value <  
490 0.05). Error bars denote 95% confidence intervals. Acronyms for the species: Carcar *Carduelis*  
491 *carduelis*, Chlchl *Chloris chloris*, Colliv *Columba livia*, Colpal *Columba palumbus*, Cyacae  
492 *Cyanistes caeruleus*, Larmic *Larus michahellis*, Motalb *Motacilla alba*, Myimon *Myiopsitta*  
493 *monachus*, Parmaj *Parus major*, Pasdom *Passer domesticus*, Phooch *Phoenicurus ochruros*,  
494 Picpic *Pica pica*, Serser *Serinus serinus*, Strdec *Streptopelia decaocto*, Stuspp *Sturnus* spp.,  
495 Turner *Turdus merula*.

496

497



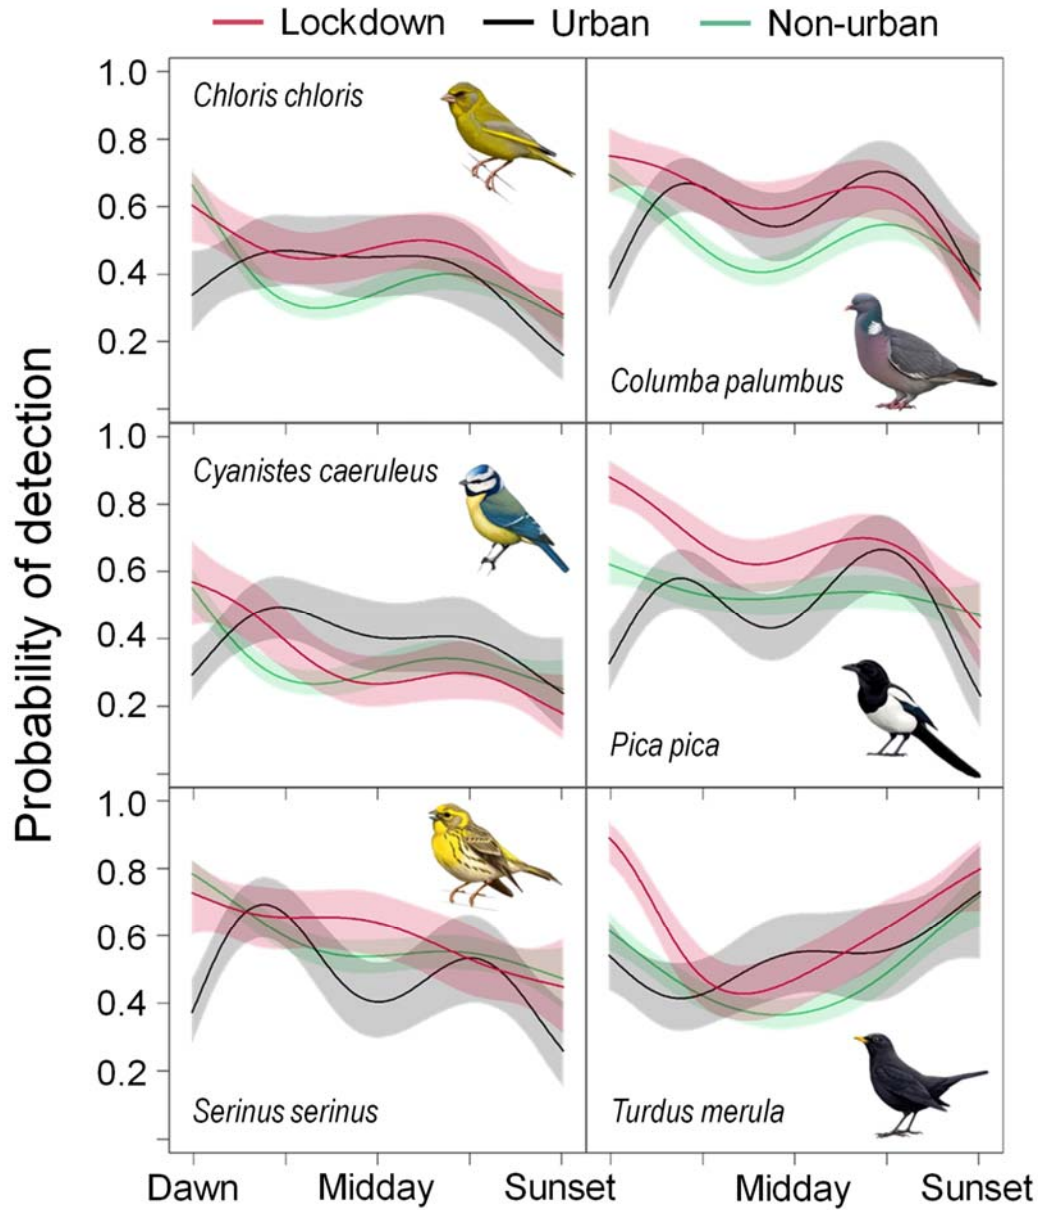

498

499 **Figure 2.** Variation in the probability of detection along the day for each group of data (collected  
500 during the lockdown, collected historically in urban sites, and collected in non-urban environments).  
501 Shaded areas represent the 95% confidence intervals. See fig. S2 in the electronic supplementary  
502 material for the rest of species. Bird illustrations by Martí Franch/Catalan Ornithological Institute.  
503

504

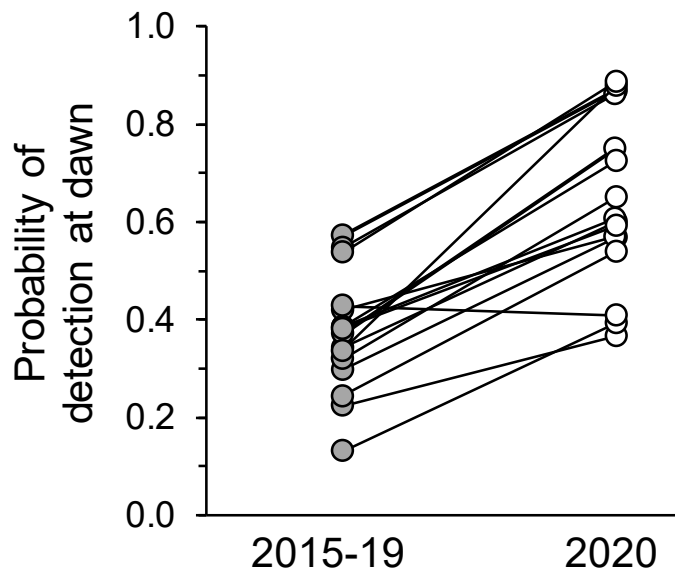

505

506

507 **Figure 3.** Probability of detection in urban environments at dawn for the 16 studied bird species  
508 before (2015-19) and during (2020) COVID-19 lockdown.

509

510

511 **Electronic supplementary information for this manuscript include the following:**

512

513 **Figure S1.** Variation in people's visiting habits to six categories of places in Catalonia between  
514 March 1<sup>st</sup> and July1<sup>st</sup>.

515 **Figure S2.** Probability of detection of birds in urban areas before and during the COVID-19  
516 lockdown

517 **Figure S3.** Variation in the probability of detection along the day for each group of data in 10 studied  
518 species.

519 **Figure S4.** Effect of sampling time on the probability of detection for each group of data.

520

521 **Table S1.** Percentage variation in people's visiting habits to six categories of places between March  
522 15<sup>th</sup> and April 14<sup>th</sup> in Catalonia and its provinces.

523 **Table S2.** Results of the occupancy part of the occupancy models.

524 **Table S3.** Results for group effects on the detection part of the occupancy models.

525 **Table S4.** *P*-values for the effects of hour, the interaction between hour and group, and the  
526 interaction between time and group in the occupancy models

527 **Table S5.** Results for the effects of the interaction between time and group on the detection part of  
528 the occupancy models.

529

**ELECTRONIC SUPPLEMENTARY INFORMATION for:**

**RAPID BEHAVIOURAL RESPONSE OF URBAN BIRDS TO COVID-19 LOCKDOWN**

Oscar Gordo\*, Lluís Brotons, Sergi Herrando, Gabriel Gargallo

\*Corresponding author

Email: [ogvilloslada@gmail.com](mailto:ogvilloslada@gmail.com)

Figures S1 to S5

Tables S1 to S4

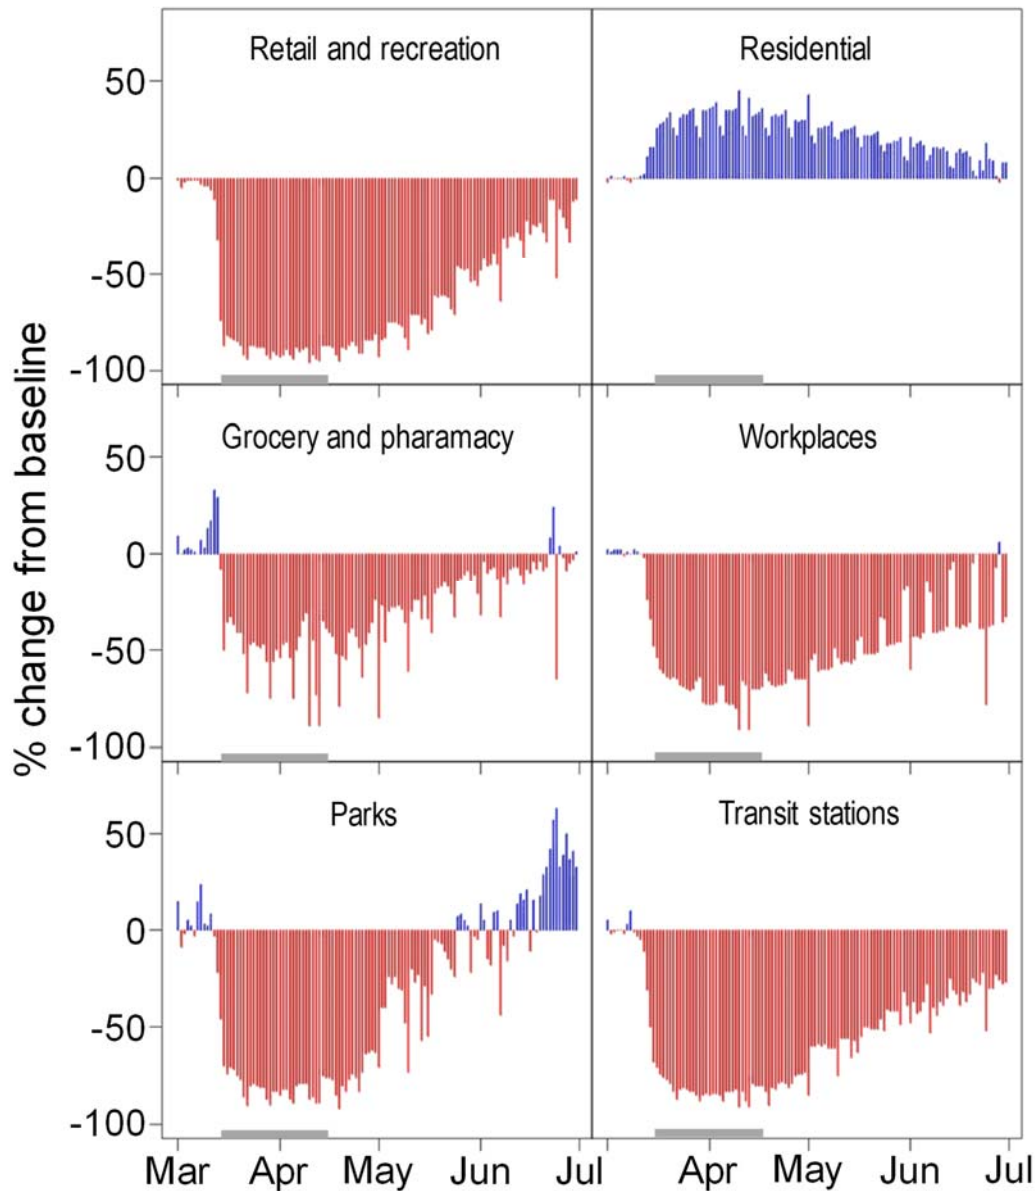

**Figure S1.** Variation in people's visiting habits to six categories of places in Catalonia between March 1<sup>st</sup> and July 1<sup>st</sup>. These graphs can be interpreted as a proxy for human activity. To improve visualization, negative deviations are shown in red and positive in blue. The grey band on to the x axis shows the period of bird data collection. The emergency state in Spain due to COVID-19 lasted from March 15<sup>th</sup> to June 21<sup>st</sup>. Note the forced strict lockdown during the first two months of this period and the following progressive recovery of activities. Figure data are freely available from "Google COVID-19 Community Mobility Reports" (<https://www.google.com/covid19/mobility/>; Accessed: August 25<sup>th</sup> 2020). Baseline level (i.e., 0%) has been calculated as the average from January 3<sup>rd</sup> to February 6<sup>th</sup> 2020 (visit the previous link for further technical details on data calculations).

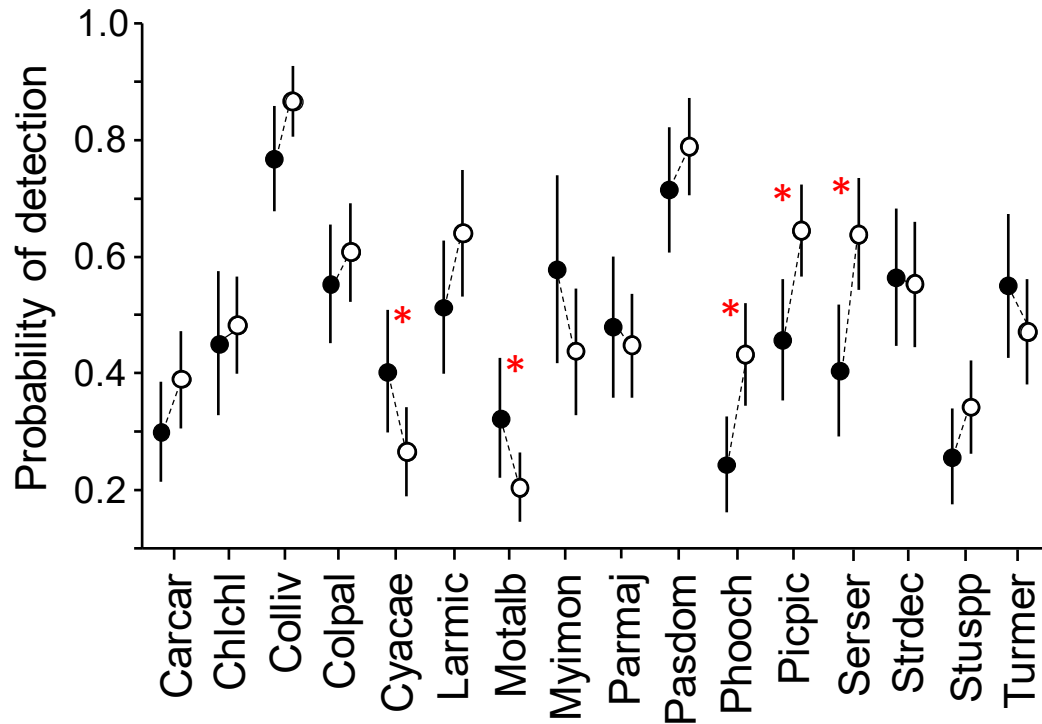

**Figure S2.** Probability of detection of birds in urban areas before (2015-19, black dots) and during (2020; white dots) the COVID-19 lockdown. Asterisks indicate significant differences ( $p$ -value < 0.05). Error bars denote 95% confidence intervals. Acronyms for the species: Carcar *Carduelis carduelis*, Chlchl *Chloris chloris*, Colliv *Columba livia*, Colpal *Columba palumbus*, Cyacae *Cyanistes caeruleus*, Larmic *Larus michahellis*, Motalb *Motacilla alba*, Myimon *Myiopsitta monachus*, Parmaj *Parus major*, Pasdom *Passer domesticus*, Phooch *Phoenicurus ochruros*, Picpic *Pica pica*, Serser *Serinus serinus*, Strdec *Streptopelia decaocto*, Stuspp *Sturnus* spp., Turner *Turdus merula*.

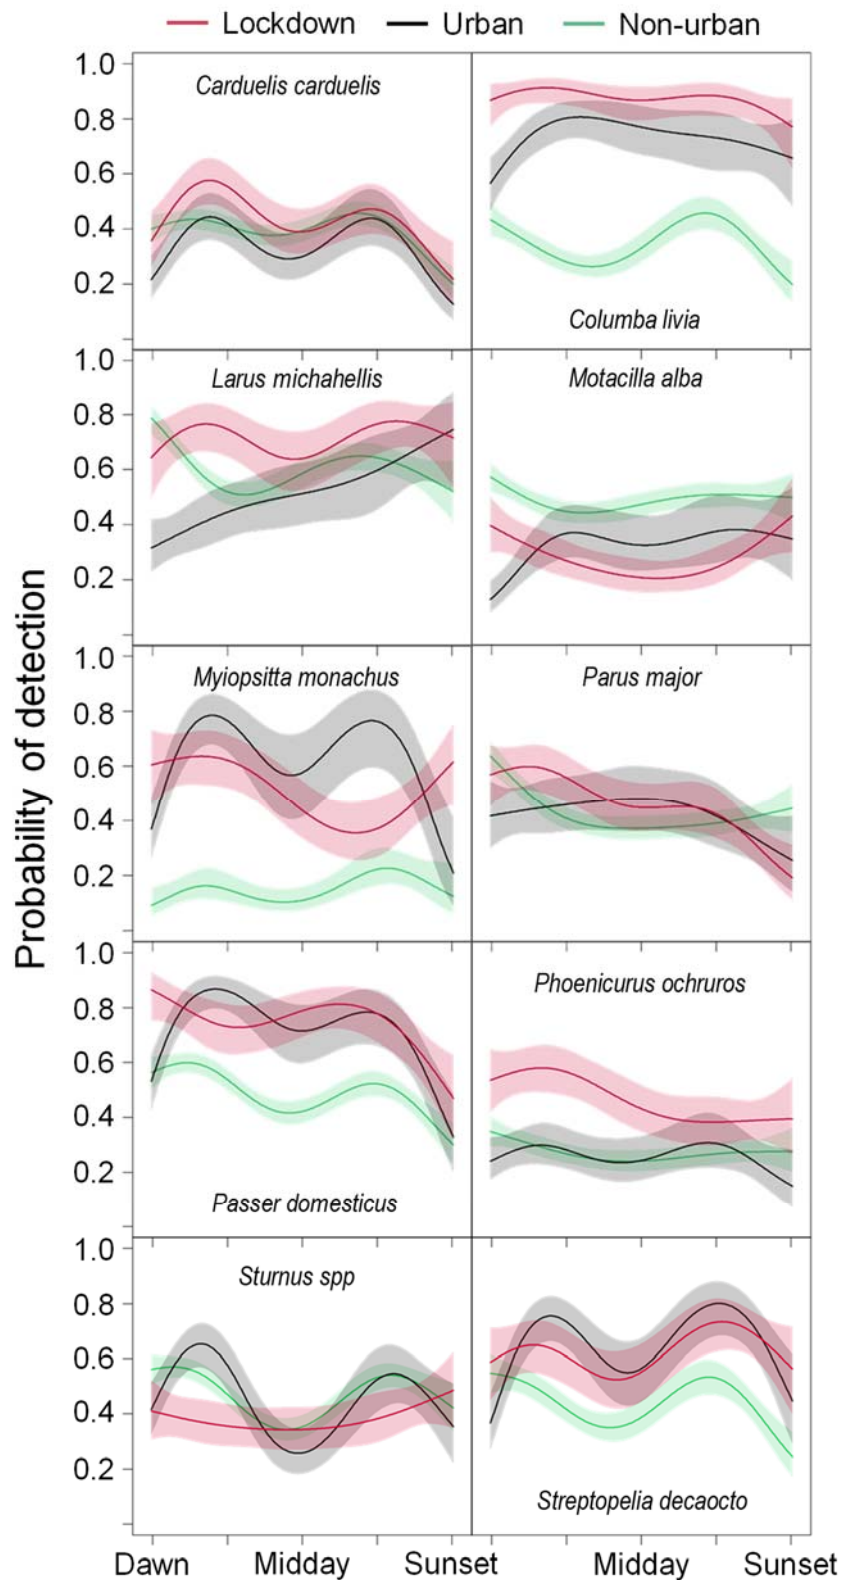

**Figure S3.** Variation in the probability of detection along de day for each group of data (collected during the lockdown, collected historically in urban sites, and collected in non-urban environments). Shaded areas represent the 95% confidence intervals.



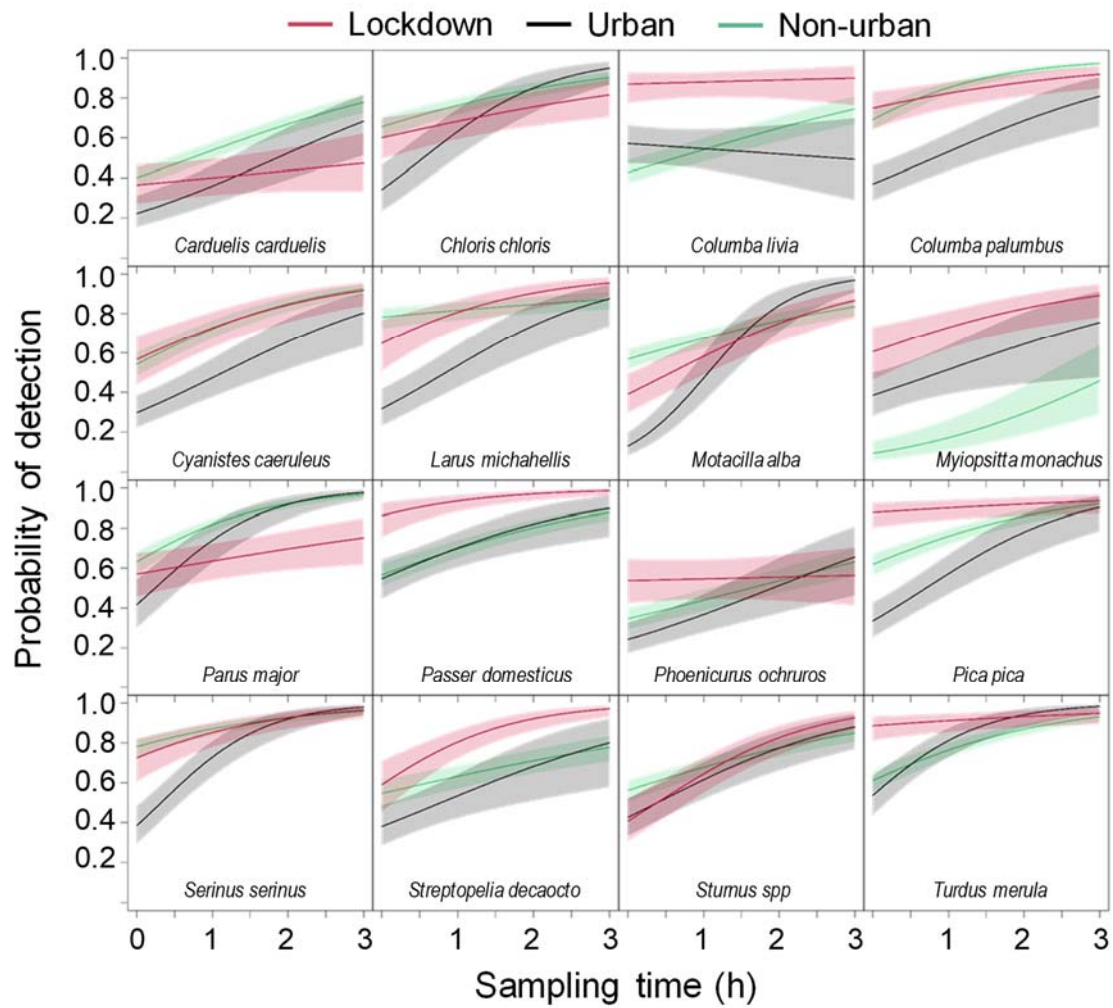

**Figure S4.** Effect of sampling time on the probability of detection for each group of data (collected during the lockdown, collected historically in urban sites, and collected in non-urban environments). Predictions done for surveys started at dawn. Shaded areas represent the 95% confidence intervals.

**Table S1.** Percentage variation in people's visiting habits to six categories of places between March 15<sup>th</sup> and April 14<sup>th</sup> in Catalonia and its provinces. The values show the average of daily deviations from the baseline level. Outdoor sites experienced a severe decline, while people stayed more at home. See figure S1 for details.

| <b>Place</b>          | <b>Catalonia</b> | <b>Barcelona</b> | <b>Girona</b> | <b>Lleida</b> | <b>Tarragona</b> |
|-----------------------|------------------|------------------|---------------|---------------|------------------|
| Retail and recreation | -89.56           | -90.41           | -88.13        | -86.19        | -88.56           |
| Grocery and pharmacy  | -51.28           | -53.13           | -51.59        | -52.72        | -53.06           |
| Parks                 | -81.34           | -83.59           | -74.22        | -62.63        | -76.63           |
| Transit Stations      | -82.41           | -82.44           | -80.41        | -78.88        | -83.00           |
| Workplaces            | -70.41           | -72.22           | -64.22        | -61.81        | -65.69           |
| Residential           | 31.25            | 32.03            | 28.41         | 26.00         | 27.84            |

**Table S2.** Results of the occupancy part of the occupancy models. *Naïve* columns show the proportion of sites where the species was found during the surveys, i.e. the raw occurrence without correction for the imperfect detection of birds. *Estimate* columns show the estimated occurrence of the studied species once the detectability was accounted for. As expected, estimated occupancy was always higher than the observed (i.e., *naïve*), demonstrating both imperfect and variable detection of birds. For the urban and non-urban groups of historical data (2015-19), a column with the differences ( $\Delta$ ) between their estimates and the lockdown group (2020 data) estimates is provided. The *p*-values for these differences are also shown. Values <0.05 are in bold. At the bottom of the table, the average and standard deviation of the studied species are given.

bioRxiv preprint doi: <https://doi.org/10.1101/2020.09.25.313144>; this version posted October 16, 2020. The copyright holder for this preprint (which was not certified by peer review) is the author/funder, who has granted bioRxiv a license to display the preprint in perpetuity. It is made available under aCC-BY-NC-ND 4.0 International license.

| Species                                        | Lockdown (2020) |               | Urban (2015-19) |               | $\Delta$                 | <i>p</i>      | Non-urban (2015-19) |               | $\Delta$                     | <i>p</i>          |
|------------------------------------------------|-----------------|---------------|-----------------|---------------|--------------------------|---------------|---------------------|---------------|------------------------------|-------------------|
|                                                | naïve           | estimate      | naïve           | estimate      | lockdown-urban estimates |               | naïve               | estimate      | lockdown-non-urban estimates |                   |
| European goldfinch, <i>Carduelis carduelis</i> | 0.5973          | 0.7635        | 0.5634          | 0.8795        | -0.1160                  | <b>0.0457</b> | 0.5401              | 0.8435        | -0.0800                      | <b>0.0677</b>     |
| Greenfinch, <i>Carduelis chloris</i>           | 0.6779          | 0.8263        | 0.5537          | 0.7342        | 0.0921                   | 0.1020        | 0.4055              | 0.6759        | 0.1504                       | <b>0.0056</b>     |
| Rock pigeon, <i>Columba livia</i>              | 0.7718          | 0.8176        | 0.4683          | 0.6024        | 0.2152                   | <b>0.0001</b> | 0.2501              | 0.4582        | 0.3593                       | <b>&lt;0.0001</b> |
| Wood pigeon, <i>Columba palumbus</i>           | 0.8859          | 0.9781        | 0.7463          | 0.9158        | 0.0623                   | 0.0695        | 0.6645              | 0.8511        | 0.1270                       | <b>0.0044</b>     |
| Blue tit, <i>Cyanistes caeruleus</i>           | 0.5235          | 0.6616        | 0.4693          | 0.6906        | -0.0290                  | 0.6364        | 0.3792              | 0.6144        | 0.0472                       | 0.3670            |
| Yellow-legged gull, <i>Larus michahellis</i>   | 0.7481          | 0.8001        | 0.5428          | 0.6970        | 0.1031                   | 0.0565        | 0.4929              | 0.6851        | 0.1150                       | <b>0.0159</b>     |
| White wagtail, <i>Motacilla alba</i>           | 0.6376          | 0.8292        | 0.6049          | 0.7675        | 0.0618                   | 0.2520        | 0.4899              | 0.7377        | 0.0915                       | 0.0735            |
| Monk parakeet, <i>Myiopsitta monachus</i>      | 0.5041          | 0.5833        | 0.3580          | 0.4373        | 0.1460                   | <b>0.0187</b> | 0.1300              | 0.3243        | 0.2590                       | <b>&lt;0.0001</b> |
| Great tit, <i>Parus major</i>                  | 0.6443          | 0.7924        | 0.6642          | 0.8548        | -0.0624                  | 0.2060        | 0.6126              | 0.8221        | -0.0296                      | 0.4840            |
| House sparrow, <i>Passer domesticus</i>        | 0.9195          | 0.9863        | 0.7677          | 0.8837        | 0.1025                   | 0.0633        | 0.5480              | 0.7649        | 0.2213                       | <b>0.0092</b>     |
| Black redstart, <i>Phoenicurus ochruros</i>    | 0.5705          | 0.7306        | 0.3585          | 0.6975        | 0.0330                   | 0.6350        | 0.2965              | 0.6426        | 0.0879                       | 0.1090            |
| Magpie, <i>Pica pica</i>                       | 0.8658          | 0.9879        | 0.7311          | 0.9076        | 0.0803                   | 0.1770        | 0.5328              | 0.7040        | 0.2839                       | <b>0.0215</b>     |
| Serin, <i>Serinus serinus</i>                  | 0.8389          | 0.9295        | 0.7732          | 0.9198        | 0.0097                   | 0.7790        | 0.6200              | 0.7851        | 0.1444                       | <b>0.0017</b>     |
| Collared dove, <i>Streptopelia decaocto</i>    | 0.8322          | 0.9052        | 0.5980          | 0.7189        | 0.1863                   | <b>0.0005</b> | 0.2842              | 0.4578        | 0.4474                       | <b>&lt;0.0001</b> |
| Starling, <i>Sturnus spp</i>                   | 0.6980          | 0.8538        | 0.6479          | 0.8774        | -0.0235                  | 0.6250        | 0.5010              | 0.7480        | 0.1058                       | <b>0.0342</b>     |
| Eurasian blackbird, <i>Turdus merula</i>       | 0.6846          | 0.7941        | 0.6073          | 0.7494        | 0.0447                   | 0.3890        | 0.5754              | 0.7853        | 0.0088                       | 0.8380            |
| <i>mean</i>                                    | <i>0.7125</i>   | <i>0.8275</i> | <i>0.5909</i>   | <i>0.7708</i> | <i>0.0566</i>            |               | <i>0.4577</i>       | <i>0.6813</i> | <i>0.1462</i>                |                   |
| <i>SD</i>                                      | <i>0.1308</i>   | <i>0.1139</i> | <i>0.1316</i>   | <i>0.1332</i> | <i>0.0882</i>            |               | <i>0.1521</i>       | <i>0.1516</i> | <i>0.1399</i>                |                   |

**Table S3.** Results for group effects on the detection part of the occupancy models. For the urban and non-urban groups, a column with the differences ( $\Delta$ ) between their estimates and the lockdown group estimates is provided. The  $p$ -values for these differences are also shown. Values  $<0.05$  are in bold. At the bottom of the table, the average and standard deviation of the studied species are given.

| Species                                        | Lockdown<br>(2020) | Urban<br>(2015-19) | $\Delta$ lockdown-<br>urban | $p$           | Non-urban<br>(2015-19) | $\Delta$ lockdown-<br>non-urban | $p$               |
|------------------------------------------------|--------------------|--------------------|-----------------------------|---------------|------------------------|---------------------------------|-------------------|
| European goldfinch, <i>Carduelis carduelis</i> | 0.3897             | 0.3002             | 0.0895                      | 0.1444        | 0.3948                 | -0.0051                         | 0.9133            |
| Greenfinch, <i>Carduelis chloris</i>           | 0.4820             | 0.4517             | 0.0303                      | 0.6938        | 0.3469                 | 0.1351                          | <b>0.0049</b>     |
| Rock pigeon, <i>Columba livia</i>              | 0.8665             | 0.7688             | 0.0978                      | 0.0716        | 0.3289                 | 0.5376                          | <b>&lt;0.0001</b> |
| Wood pigeon, <i>Columba palumbus</i>           | 0.6070             | 0.5535             | 0.0534                      | 0.4289        | 0.4302                 | 0.1768                          | <b>0.0005</b>     |
| Blue tit, <i>Cyanistes caeruleus</i>           | 0.2658             | 0.4035             | -0.1377                     | <b>0.0364</b> | 0.3036                 | -0.0378                         | 0.4140            |
| Yellow-legged gull, <i>Larus michahellis</i>   | 0.6405             | 0.5131             | 0.1274                      | 0.1182        | 0.5865                 | 0.0540                          | 0.3912            |
| White wagtail, <i>Motacilla alba</i>           | 0.2052             | 0.3233             | -0.1181                     | <b>0.0419</b> | 0.4716                 | -0.2664                         | <b>&lt;0.0001</b> |
| Monk parakeet, <i>Myiopsitta monachus</i>      | 0.4378             | 0.5773             | -0.1395                     | 0.1640        | 0.1097                 | 0.3281                          | <b>&lt;0.0001</b> |
| Great tit, <i>Parus major</i>                  | 0.4479             | 0.4803             | -0.0324                     | 0.6730        | 0.3717                 | 0.0762                          | 0.1290            |
| House sparrow, <i>Passer domesticus</i>        | 0.7891             | 0.7150             | 0.0740                      | 0.2820        | 0.4224                 | 0.3667                          | <b>&lt;0.0001</b> |
| Black redstart, <i>Phoenicurus ochruros</i>    | 0.4321             | 0.2437             | 0.1885                      | <b>0.0028</b> | 0.2414                 | 0.1907                          | <b>&lt;0.0001</b> |
| Magpie, <i>Pica pica</i>                       | 0.6452             | 0.4573             | 0.1879                      | <b>0.0058</b> | 0.5259                 | 0.1192                          | <b>0.0169</b>     |
| Serin, <i>Serinus serinus</i>                  | 0.6385             | 0.4040             | 0.2345                      | <b>0.0027</b> | 0.5393                 | 0.0993                          | 0.0810            |
| Collared dove, <i>Streptopelia decaocto</i>    | 0.5525             | 0.5649             | -0.0124                     | 0.8790        | 0.3876                 | 0.1648                          | <b>0.0092</b>     |
| Starling, <i>Sturnus spp</i>                   | 0.3426             | 0.2574             | 0.0852                      | 0.1510        | 0.3534                 | -0.0108                         | 0.8140            |
| Eurasian blackbird, <i>Turdus merula</i>       | 0.4717             | 0.5500             | -0.0783                     | 0.3100        | 0.3683                 | 0.1034                          | <b>0.0394</b>     |
| <i>mean</i>                                    | <i>0.5134</i>      | <i>0.4728</i>      | <i>0.0406</i>               |               | <i>0.3864</i>          | <i>0.1270</i>                   |                   |
| <i>SD</i>                                      | <i>0.1789</i>      | <i>0.1508</i>      | <i>0.1182</i>               |               | <i>0.1167</i>          | <i>0.1830</i>                   |                   |

**Table S4.** *P*-values for the effects of hour, the interaction between hour and group, and the interaction between time and group in the occupancy models. *f* refers to the basis function used to model the non-linear effect of hour on bird detectability.

| Species                                        | <i>f</i> (hour) | <i>f</i> (hour)*group | time*group |
|------------------------------------------------|-----------------|-----------------------|------------|
| European goldfinch, <i>Carduelis carduelis</i> | <0.00001        | 0.14308               | 0.04767    |
| Greenfinch, <i>Carduelis chloris</i>           | <0.00001        | 0.00291               | 0.02069    |
| Rock pigeon, <i>Columba livia</i>              | 0.00754         | 0.00137               | 0.04995    |
| Wood pigeon, <i>Columba palumbus</i>           | <0.00001        | 0.00001               | 0.93144    |
| Blue tit, <i>Cyanistes caeruleus</i>           | <0.00001        | 0.00002               | 0.94749    |
| Yellow-legged gull, <i>Larus michahellis</i>   | 0.00256         | 0.00001               | 0.00328    |
| White wagtail, <i>Motacilla alba</i>           | 0.09982         | 0.00018               | 0.00001    |
| Monk parakeet, <i>Myiopsitta monachus</i>      | 0.00455         | 0.00008               | 0.83579    |
| Great tit, <i>Parus major</i>                  | <0.00001        | 0.00113               | 0.00023    |
| House sparrow, <i>Passer domesticus</i>        | <0.00001        | 0.00073               | 0.64000    |
| Black redstart, <i>Phoenicurus ochruros</i>    | 0.01681         | 0.11286               | 0.05613    |
| Magpie, <i>Pica pica</i>                       | 0.00048         | 0.00009               | 0.02690    |
| Serin, <i>Serinus serinus</i>                  | <0.00001        | 0.00027               | 0.01794    |
| Collared dove, <i>Streptopelia decaocto</i>    | 0.00003         | 0.00039               | 0.02776    |
| Starling, <i>Sturnus spp</i>                   | <0.00001        | 0.00594               | 0.04043    |
| Eurasian blackbird, <i>Turdus merula</i>       | <0.00001        | 0.00464               | 0.00649    |

**Table S5.** Results for the effects of the interaction between time and group on the detection part of the occupancy models. Columns lockdown, urban and non-urban show the probability of detection of the species after 1 hour of survey. A probability of 0.5 means that the observers may or may not detect the species with the same probability (i.e. flat slope). Except the rock pigeon in urban checklists, in all cases, as expected, these probabilities were above 0.5 (i.e., increased probability of detection of a species throughout sampling time). For the lockdown estimates, the *p*-value testing whether or not this slope was different from 0.5 is shown. However, in urban and non-urban groups, the *p*-value shows whether or not these slopes differed from the lockdown group. The difference ( $\Delta$ ) between these slopes is also provided to enhance result interpretation.

| Species                                        | Lockdown<br>(2020) | <i>p</i>          | Urban<br>(2015-19) | $\Delta$ lockdown-<br>urban | <i>p</i>          | Non-urban<br>(2015-19) | $\Delta$ lockdown-<br>non-urban | <i>p</i>          |
|------------------------------------------------|--------------------|-------------------|--------------------|-----------------------------|-------------------|------------------------|---------------------------------|-------------------|
| European goldfinch, <i>Carduelis carduelis</i> | 0.5372             | 0.1908            | 0.6620             | -0.1248                     | <b>0.0019</b>     | 0.6345                 | -0.0973                         | <b>0.0012</b>     |
| Greenfinch, <i>Carduelis chloris</i>           | 0.5889             | <b>0.0023</b>     | 0.7675             | -0.1786                     | <b>0.0002</b>     | 0.6282                 | -0.0394                         | 0.2063            |
| Rock pigeon, <i>Columba livia</i>              | 0.5250             | 0.6086            | 0.4735             | 0.0515                      | 0.4093            | 0.6112                 | -0.0862                         | 0.0861            |
| Wood pigeon, <i>Columba palumbus</i>           | 0.6805             | <b>&lt;0.0001</b> | 0.6757             | 0.0048                      | 0.9130            | 0.6920                 | -0.0115                         | 0.7310            |
| Blue tit, <i>Cyanistes caeruleus</i>           | 0.6710             | <b>&lt;0.0001</b> | 0.6800             | -0.0091                     | 0.8400            | 0.6863                 | -0.0154                         | 0.6480            |
| Yellow-legged gull, <i>Larus michahellis</i>   | 0.6936             | <b>0.0001</b>     | 0.7120             | -0.0184                     | 0.7438            | 0.5537                 | 0.1399                          | <b>0.0061</b>     |
| White wagtail, <i>Motacilla alba</i>           | 0.6839             | <b>&lt;0.0001</b> | 0.8566             | -0.1726                     | <b>0.0001</b>     | 0.6107                 | 0.0733                          | <b>0.0130</b>     |
| Monk parakeet, <i>Myiopsitta monachus</i>      | 0.6371             | <b>0.0008</b>     | 0.6298             | 0.0073                      | 0.9110            | 0.6685                 | -0.0314                         | 0.4990            |
| Great tit, <i>Parus major</i>                  | 0.5682             | <b>0.0197</b>     | 0.7988             | -0.2306                     | <b>&lt;0.0001</b> | 0.7243                 | -0.1560                         | <b>&lt;0.0001</b> |
| House sparrow, <i>Passer domesticus</i>        | 0.6983             | <b>0.0001</b>     | 0.6602             | 0.0381                      | 0.5410            | 0.6384                 | 0.0599                          | 0.2120            |
| Black redstart, <i>Phoenicurus ochruros</i>    | 0.5089             | 0.7519            | 0.6446             | -0.1357                     | <b>0.0019</b>     | 0.5965                 | -0.0876                         | <b>0.0041</b>     |
| Magpie, <i>Pica pica</i>                       | 0.5584             | 0.0532            | 0.7258             | -0.1674                     | <b>0.0005</b>     | 0.6599                 | -0.1014                         | <b>0.0021</b>     |
| Serin, <i>Serinus serinus</i>                  | 0.6862             | <b>&lt;0.0001</b> | 0.8111             | -0.1248                     | <b>0.0114</b>     | 0.6536                 | 0.0327                          | 0.4020            |
| Collared dove, <i>Streptopelia decaocto</i>    | 0.7411             | <b>&lt;0.0001</b> | 0.6514             | 0.0897                      | 0.1240            | 0.5881                 | 0.1530                          | <b>0.0006</b>     |
| Starling, <i>Sturnus spp</i>                   | 0.7244             | <b>&lt;0.0001</b> | 0.6823             | 0.0421                      | 0.3050            | 0.6212                 | 0.1032                          | <b>0.0013</b>     |
| Eurasian blackbird, <i>Turdus merula</i>       | 0.5705             | <b>0.0234</b>     | 0.7883             | -0.2178                     | <b>&lt;0.0001</b> | 0.6726                 | -0.1021                         | <b>0.0018</b>     |

bioRxiv preprint doi: <https://doi.org/10.1101/2020.09.25.313148>; this version posted October 16, 2020. The copyright holder for this preprint (which was not certified by peer review) is the author/funder, who has granted bioRxiv a license to display the preprint in perpetuity. It is made available under aCC-BY-NC-ND 4.0 International license.
